# Supplementary material for: Mobilization of Nuclear Copper by Green Tea Polyphenol Epicatechin-3-Gallate and Subsequent Prooxidant Breakage of Cellular DNA: Implications for Cancer Chemotherapy
Source: PubMed Central journal article supplement (PMC5297669; doi:10.3390/ijms18010034), 2016-12-26
Supplement: ijms-18-00034-s001.pdf [file ijms-18-00034-s001.pdf]

# Supplementary Materials: Mobilization of Nuclear Copper by Green Tea Polyphenol Epicatechin-3-Gallate and Subsequent Prooxidant Breakage of Cellular DNA: Implications for Cancer Chemotherapy

Mohd Farhan, Mohammad Oves, Sandesh Chibber, Sheikh Mumtaz Hadi and Aamir Ahmad

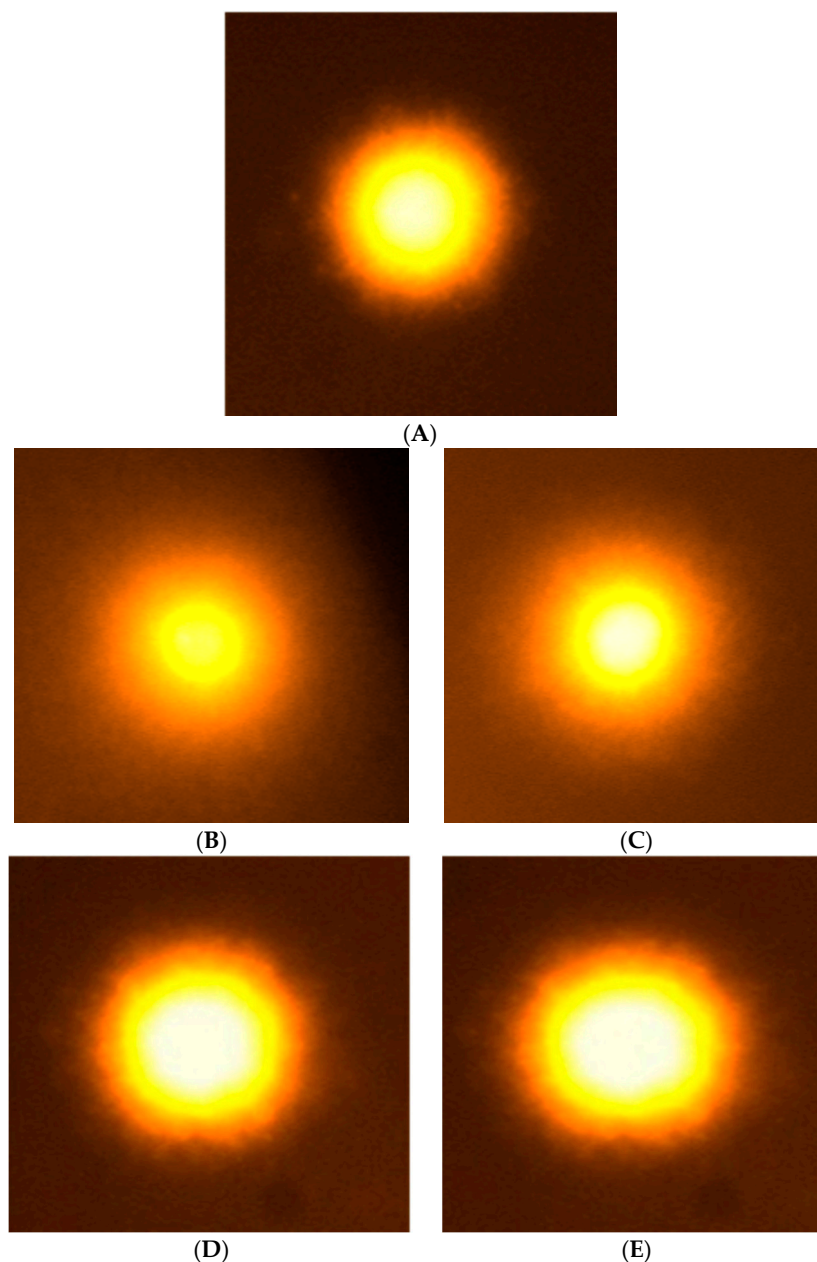

Figure S1. Cont.

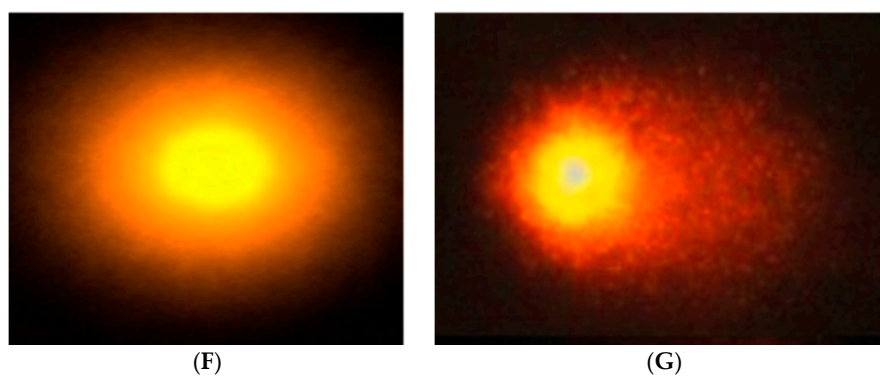

**Figure S1.** Single cell gel electrophoresis of human peripheral lymphocytes showing Comets (100×) after treatment with different concentrations of Epicatechin-3-gallate and Cu(II): (A) Untreated; (B) ECG alone (10  $\mu$ M); (C) ECG (10  $\mu$ M) + Cu(II) 50  $\mu$ M; (D) ECG alone (25  $\mu$ M); (E) ECG (25  $\mu$ M) + Cu(II) (50  $\mu$ M); (F) ECG alone (50  $\mu$ M); (G) ECG (50  $\mu$ M) + Cu(II) (50  $\mu$ M).
